# Supplementary material for: Chemical Fractionation of Trace Elements in Arctic PM10 Samples
Source: MDPI journal article supplement (doi:10.3390/atmos12091152), 2021-09-07
Supplement: s1 [file s1]

**Supplementary Table S1.** Experimental conditions, limits of detection (LOD) and sample blanks (SB) of the analytes of interest with the technique used for their determination after direct digestion.

| SF-ICP-MS |             |            |               |              | ICP-OES   |        |               |              |
|-----------|-------------|------------|---------------|--------------|-----------|--------|---------------|--------------|
|           | Isotope     | Resolution | LOD<br>(ng/L) | SB<br>(µg/L) |           | λ (nm) | LOD<br>(µg/L) | SB<br>(µg/L) |
| <b>Al</b> | 27          | LR-MR      | 400           | 0.63         | <b>Ca</b> | 317.93 | 3.1           | 260          |
| <b>As</b> | 75          | MR         | 42            | < LOD        | <b>K</b>  | 769.90 | 1.5           | 8.8          |
| <b>Ba</b> | 135-137-138 | LR-MR      | 300           | 62           | <b>Mg</b> | 285.21 | 1.2           | < LOD        |
| <b>Cd</b> | 111-112-114 | LR         | 2.3           | < LOD        | <b>Na</b> | 589.59 | 11            | 210          |
| <b>Co</b> | 59          | LR-MR      | 1.9           | < LOD        |           |        |               |              |
| <b>Cr</b> | 53          | MR         | 10            | < LOD        |           |        |               |              |
| <b>Cu</b> | 63-65       | LR-MR      | 11            | < LOD        |           |        |               |              |
| <b>Fe</b> | 56-57       | MR         | 400           | 3.2          |           |        |               |              |
| <b>Mn</b> | 55          | LR-MR      | 8.6           | 0.04         |           |        |               |              |
| <b>Ni</b> | 60-61-62    | LR-MR      | 45            | 0.5          |           |        |               |              |
| <b>Pb</b> | 206-207-208 | LR-MR      | 40            | 0.23         |           |        |               |              |
| <b>Sb</b> | 121-123     | MR         | 23            | < LOD        |           |        |               |              |
| <b>Ti</b> | 46-47-48    | LR-MR      | 750           | < LOD        |           |        |               |              |
| <b>V</b>  | 51          | LR-MR      | 58            | < LOD        |           |        |               |              |
| <b>Zn</b> | 66-68       | LR-MR      | 190           | 4.5          |           |        |               |              |

LR = low resolution; MR = medium resolution

**Supplementary Table S2.** Experimental conditions, limits of detection (LOD) and sample blanks (SB) of the analytes of interest with the technique used for their determination in fraction I and fraction II.

| Fraction I |             |            |           |       | Fraction II |             |            |           |       | Fraction I |            |           |     |
|------------|-------------|------------|-----------|-------|-------------|-------------|------------|-----------|-------|------------|------------|-----------|-----|
| SF-ICP-MS  |             |            |           |       | SF-ICP-MS   |             |            |           |       | ICP-OES    |            |           |     |
| Isotope    | Resolution  | LOD (ng/L) | SB (µg/L) |       | Isotope     | Resolution  | LOD (ng/L) | SB (µg/L) |       | λ (nm)     | LOD (µg/L) | SB (µg/L) |     |
| Al         | 27          | LR-MR      | 250       | 8.2   | Al          | 27          | LR-MR      | 400       | 40    | Ca         | 317.93     | 8.5       | 60  |
| As         | 75          | MR         | 3.4       | 0.02  | As          | 75          | MR         | 42        | < LOD | K          | 769.90     | 4.5       | 17  |
| Ba         | 135-137-138 | LR-MR      | 120       | 0.2   | Ba          | 135-137-138 | LR-MR      | 300       | 1.5   | Mg         | 285.21     | 3.0       | 8.7 |
| Cd         | 111-112-114 | LR         | 12        | < LOD | Cd          | 111-112-114 | LR         | 2.3       | 0.03  | Na         | 589.59     | 3.3       | 126 |
| Co         | 59          | LR-MR      | 8         | < LOD | Co          | 59          | LR-MR      | 1.9       | 0.02  | Zn         | 213.86     | 0.7       | 9.4 |
| Cr         | 53          | MR         | 30        | 0.08  | Cr          | 53          | MR         | 10        | 0.05  |            |            |           |     |
| Cu         | 63-65       | LR-MR      | 42        | 0.21  | Cu          | 63-65       | LR-MR      | 11        | 0.35  |            |            |           |     |
| Fe         | 56-57       | MR         | 430       | 2.3   | Fe          | 56-57       | MR         | 400       | 34    |            |            |           |     |
| Mn         | 55          | LR-MR      | 45        | 0.13  | Mn          | 55          | LR-MR      | 8.6       | 0.7   |            |            |           |     |
| Ni         | 60-61-62    | LR-MR      | 83        | 1.3   | Ni          | 60-61-62    | LR-MR      | 45        | 0.5   |            |            |           |     |
| Pb         | 206-207-208 | LR-MR      | 24        | 0.62  | Pb          | 206-207-208 | LR-MR      | 40        | 0.35  |            |            |           |     |
| Sb         | 121-123     | MR         | 23        | 0.13  | Sb          | 121-123     | MR         | 23        | < LOD |            |            |           |     |
| Ti         | 46-47-48    | LR-MR      | 50        | 0.20  | Ti          | 46-47-48    | LR-MR      | 750       | 1.2   |            |            |           |     |
| V          | 51          | LR-MR      | 10        | < LOD | V           | 51          | LR-MR      | 58        | < LOD |            |            |           |     |
| Zn         | 66-68       | LR-MR      | 160       | 9.4   | Zn          | 66-68       | LR-MR      | 190       | 5.2   |            |            |           |     |

| Fraction II |        |            |           |
|-------------|--------|------------|-----------|
| ICP-OES     |        |            |           |
|             | λ (nm) | LOD (µg/L) | SB (µg/L) |
| Ca          | 317.93 | 3.1        | 168       |
| K           | 769.90 | 1.5        | 15        |
| Mg          | 285.21 | 1.2        | 12        |
| Na          | 589.59 | 11         | 80        |
| Zn          | 213.86 | 1.0        | 5.2       |

LR = low resolution; MR = medium resolution

**Supplementary Table S3.** Major element concentrations in Arctic PM<sub>10</sub> samples collected in 2015. All the values are expressed in ng/m<sup>3</sup>.

| Sampling start date       | Al          | Ca           | Fe          | K           | Mg          | Na         | Sampling start date        | Al          | Ca           | Fe          | K           | Mg          | Na         |
|---------------------------|-------------|--------------|-------------|-------------|-------------|------------|----------------------------|-------------|--------------|-------------|-------------|-------------|------------|
| 28 <sup>th</sup> February | 6.96 ± 0.05 | 26.6 ± 0.6   | 5.8 ± 0.1   | 19.0 ± 0.5  | 70.6 ± 0.6  | 478 ± 5    | 24 <sup>th</sup> June      | 2.08 ± 0.02 | 10.9 ± 0.2   | 2.55 ± 0.04 | 4.50 ± 0.09 | 10.3 ± 0.2  | 74 ± 1     |
| 4 <sup>th</sup> March     | 0.36 ± 0.01 | 6.96 ± 0.02  | 0.67 ± 0.02 | 5.78 ± 0.09 | 21.8 ± 0.1  | 168 ± 1    | 28 <sup>th</sup> June      | 2.08 ± 0.08 | 12.9 ± 0.4   | 2.17 ± 0.06 | 6.0 ± 0.2   | 18.9 ± 0.3  | 144 ± 1    |
| 8 <sup>th</sup> March     | 1.77 ± 0.05 | 28.5 ± 0.7   | 2.4 ± 0.1   | 21.1 ± 0.1  | 79 ± 1      | 599 ± 9    | 2 <sup>nd</sup> July       | 0.64 ± 0.02 | 13.9 ± 0.2   | 1.02 ± 0.03 | 8.72 ± 0.08 | 26 ± 1      | 208 ± 2    |
| 12 <sup>th</sup> March    | 5.3 ± 0.2   | 38.3 ± 0.9   | 8.06 ± 0.09 | 33 ± 1      | 109 ± 2     | 858 ± 27   | 6 <sup>th</sup> July       | 3.56 ± 0.04 | 13.4 ± 0.2   | 3.83 ± 0.06 | 5.1 ± 0.2   | 12.4 ± 0.1  | 88.8 ± 0.8 |
| 16 <sup>th</sup> March    | 7.7 ± 0.2   | 39.8 ± 0.9   | 5.61 ± 0.06 | 27.4 ± 0.8  | 90 ± 2      | 573 ± 9    | 10 <sup>th</sup> July      | 27.1 ± 0.3  | 17.0 ± 0.2   | 7.6 ± 0.1   | 19.8 ± 0.1  | 11.0 ± 0.3  | 63.8 ± 0.5 |
| 20 <sup>th</sup> March    | 8.2 ± 0.1   | 9.5 ± 0.3    | 5.7 ± 0.1   | 5.1 ± 0.1   | 12.7 ± 0.1  | 71.0 ± 0.8 | 14 <sup>th</sup> July      | 4.28 ± 0.09 | 9.37 ± 0.04  | 2.21 ± 0.06 | < 1.98      | 4.16 ± 0.04 | 24.6 ± 0.3 |
| 24 <sup>th</sup> March    | 4.5 ± 0.1   | 13.7 ± 0.3   | 3.94 ± 0.05 | 12.2 ± 0.2  | 40.3 ± 0.2  | 342 ± 4    | 18 <sup>th</sup> July      | 1.19 ± 0.01 | 5.3 ± 0.1    | 0.63 ± 0.01 | 2.94 ± 0.02 | 2.31 ± 0.04 | 31.5 ± 0.5 |
| 28 <sup>th</sup> March    | 3.3 ± 0.1   | 18.8 ± 0.7   | 2.9 ± 0.1   | 12.3 ± 0.1  | 46.7 ± 0.9  | 325 ± 4    | 22 <sup>nd</sup> July      | 1.27 ± 0.02 | 12.33 ± 0.08 | 1.63 ± 0.03 | 5.83 ± 0.01 | 20.0 ± 0.1  | 171 ± 3    |
| 1 <sup>st</sup> April     | 30.8 ± 0.4  | 28.6 ± 0.9   | 19.5 ± 0.1  | 18.5 ± 0.5  | 42 ± 1      | 238 ± 3    | 26 <sup>th</sup> July      | 1.15 ± 0.02 | 10.01 ± 0.07 | 1.98 ± 0.03 | 4.4 ± 0.1   | 14.3 ± 0.3  | 104 ± 1    |
| 5 <sup>th</sup> April     | 28.1 ± 0.8  | 49.7 ± 0.6   | 22.3 ± 0.1  | 19.1 ± 0.1  | 41.3 ± 0.6  | 220 ± 3    | 30 <sup>th</sup> July      | 7.45 ± 0.05 | 9.7 ± 0.1    | 5.16 ± 0.09 | 3.94 ± 0.07 | 5.06 ± 0.09 | 27.3 ± 0.1 |
| 9 <sup>th</sup> April     | 5.46 ± 0.09 | 8.1 ± 0.1    | 5.3 ± 0.1   | 6.0 ± 0.2   | 9.3 ± 0.3   | 61 ± 1     | 3 <sup>rd</sup> August     | 5.55 ± 0.08 | 15.8 ± 0.2   | 4.4 ± 0.1   | 10.8 ± 0.1  | 23.3 ± 0.3  | 171 ± 1    |
| 13 <sup>th</sup> April    | 9.1 ± 0.2   | 27.2 ± 0.4   | 8.0 ± 0.1   | 21.0 ± 0.1  | 66 ± 2      | 500 ± 1    | 7 <sup>th</sup> August     | 1.38 ± 0.01 | 6.1 ± 0.3    | 1.13 ± 0.02 | 2.89 ± 0.07 | 4.91 ± 0.05 | 41.8 ± 0.3 |
| 17 <sup>th</sup> April    | 2.5 ± 0.1   | 3.85 ± 0.06  | 1.8 ± 0.1   | 2.71 ± 0.02 | 8.0 ± 0.1   | 59.8 ± 0.2 | 11 <sup>th</sup> August    | 3.0 ± 0.1   | 10.5 ± 0.3   | 2.18 ± 0.08 | 3.56 ± 0.03 | 8.71 ± 0.09 | 55 ± 1     |
| 21 <sup>st</sup> April    | 3.3 ± 0.1   | 6.1 ± 0.1    | 2.50 ± 0.08 | 3.7 ± 0.1   | 12.8 ± 0.3  | 84.6 ± 0.1 | 15 <sup>th</sup> August    | 2.04 ± 0.05 | 10.5 ± 0.1   | 2.01 ± 0.04 | 7.4 ± 0.1   | 21.9 ± 0.5  | 187 ± 2    |
| 25 <sup>th</sup> April    | 4.46 ± 0.07 | 11.57 ± 0.08 | 3.22 ± 0.05 | 4.08 ± 0.07 | 11.7 ± 0.1  | 75 ± 1     | 19 <sup>th</sup> August    | 0.95 ± 0.01 | 10.3 ± 0.3   | 1.55 ± 0.03 | 6.7 ± 0.1   | 22.6 ± 0.4  | 195 ± 1    |
| 29 <sup>th</sup> April    | 6.63 ± 0.06 | 16.7 ± 0.2   | 4.97 ± 0.08 | 4.9 ± 0.1   | 10.9 ± 0.1  | 61 ± 1     | 23 <sup>th</sup> August    | 1.09 ± 0.05 | 5.21 ± 0.08  | 1.18 ± 0.04 | 2.99 ± 0.05 | 5.5 ± 0.1   | 47 ± 1     |
| 3 <sup>rd</sup> May       | 4.59 ± 0.07 | 15.0 ± 0.2   | 3.47 ± 0.05 | 5.4 ± 0.2   | 17.9 ± 0.2  | 125 ± 1    | 27 <sup>th</sup> August    | 0.90 ± 0.01 | 3.64 ± 0.07  | 0.78 ± 0.01 | 2.44 ± 0.08 | 3.4 ± 0.1   | 32.3 ± 0.3 |
| 7 <sup>th</sup> May       | 9.3 ± 0.1   | 14.69 ± 0.06 | 5.0 ± 0.1   | 5.85 ± 0.06 | 16.3 ± 0.1  | 112 ± 1    | 31 <sup>st</sup> August    | 1.06 ± 0.03 | 8.0 ± 0.1    | 0.99 ± 0.03 | 2.39 ± 0.03 | 9.04 ± 0.09 | 63 ± 1     |
| 11 <sup>th</sup> May      | 1.86 ± 0.07 | 8.6 ± 0.1    | 1.43 ± 0.06 | 2.92 ± 0.05 | 7.0 ± 0.1   | 45.2 ± 0.7 | 4 <sup>th</sup> September  | 0.95 ± 0.02 | 10.1 ± 0.2   | 1.14 ± 0.02 | 4.5 ± 0.1   | 14.5 ± 0.2  | 112 ± 1    |
| 15 <sup>th</sup> May      | 1.02 ± 0.02 | 7.01 ± 0.08  | 0.91 ± 0.01 | 2.66 ± 0.03 | 9.45 ± 0.05 | 71.5 ± 0.5 | 8 <sup>th</sup> September  | 9.8 ± 0.1   | 28.0 ± 0.5   | 7.5 ± 0.1   | 14.1 ± 0.2  | 50.4 ± 0.4  | 370 ± 3    |
| 19 <sup>th</sup> May      | 3.62 ± 0.06 | 17.4 ± 0.1   | 2.80 ± 0.05 | 10.8 ± 0.1  | 36.0 ± 0.1  | 270 ± 3    | 12 <sup>th</sup> September | 2.39 ± 0.04 | 14.1 ± 0.1   | 2.42 ± 0.05 | 9.5 ± 0.1   | 27.8 ± 0.4  | 233 ± 1    |
| 23 <sup>rd</sup> May      | 4.42 ± 0.05 | 17.3 ± 0.6   | 3.32 ± 0.04 | 8.80 ± 0.08 | 29.3 ± 0.2  | 213 ± 3    | 16 <sup>th</sup> September | 18.9 ± 0.5  | 69 ± 2       | 16.9 ± 0.4  | 52.8 ± 0.3  | 162 ± 3     | 1242 ± 1   |
| 27 <sup>th</sup> May      | 6.9 ± 0.2   | 12.57 ± 0.06 | 4.57 ± 0.07 | 5.81 ± 0.07 | 15.5 ± 0.2  | 118 ± 2    | 20 <sup>th</sup> September | 5.96 ± 0.04 | 14.3 ± 0.2   | 4.75 ± 0.06 | 7.4 ± 0.2   | 19.1 ± 0.6  | 141 ± 1    |
| 31 <sup>st</sup> May      | 7.2 ± 0.2   | 10.5 ± 0.2   | 7.6 ± 0.4   | 5.7 ± 0.1   | 11.9 ± 0.2  | 74 ± 1     | 24 <sup>th</sup> September | 0.59 ± 0.01 | 7.04 ± 0.06  | 0.33 ± 0.01 | 2.56 ± 0.02 | 10.4 ± 0.1  | 75.9 ± 0.4 |
| 4 <sup>th</sup> June      | 2.04 ± 0.04 | 14.68 ± 0.07 | 2.34 ± 0.05 | 9.1 ± 0.2   | 31.8 ± 0.7  | 243 ± 1    | 28 <sup>th</sup> September | 4.5 ± 0.1   | 40.6 ± 0.9   | 4.03 ± 0.09 | 28.3 ± 0.1  | 95 ± 1      | 838 ± 7    |
| 8 <sup>th</sup> June      | 8.6 ± 0.1   | 20.5 ± 0.3   | 7.1 ± 0.1   | 7.8 ± 0.2   | 21.8 ± 0.8  | 139 ± 1    | 2 <sup>nd</sup> October    | 11.6 ± 0.2  | 19.9 ± 0.8   | 9.3 ± 0.2   | 7.1 ± 0.3   | 15.1 ± 0.4  | 73.8 ± 0.8 |
| 12 <sup>th</sup> June     | 20.6 ± 0.1  | 55 ± 2       | 18.4 ± 0.5  | 14.4 ± 0.2  | 40.5 ± 0.8  | 184 ± 4    | 6 <sup>th</sup> October    | 1.54 ± 0.08 | 26.0 ± 0.9   | 1.57 ± 0.06 | 20.2 ± 0.4  | 73.9 ± 0.6  | 619 ± 1    |
| 16 <sup>th</sup> June     | 4.9 ± 0.1   | 12.5 ± 0.1   | 2.28 ± 0.05 | 7.4 ± 0.1   | 24.5 ± 0.3  | 189 ± 2    | 14 <sup>th</sup> October   | 7.7 ± 0.2   | 19.5 ± 0.5   | 7.5 ± 0.1   | 12.0 ± 0.4  | 37.5 ± 0.4  | 306 ± 6    |
| 20 <sup>th</sup> June     | 0.88 ± 0.01 | 13.9 ± 0.3   | 1.45 ± 0.02 | 4.27 ± 0.08 | 12.2 ± 0.3  | 83 ± 1     | 18 <sup>th</sup> October   | 2.05 ± 0.06 | 9.34 ± 0.03  | 1.93 ± 0.03 | 4.6 ± 0.1   | 14.0 ± 0.1  | 107 ± 2    |

**Supplementary Table S4.** Minor and trace element concentrations in Arctic PM<sub>10</sub> samples collected in 2015. All the values are expressed in pg/m<sup>3</sup>.

| Sampling start date       | As         | Ba         | Cd            | Co          | Cr          | Cu         | Mn         | Ni         | Pb         | Sb          | Ti         | V           | Zn          |
|---------------------------|------------|------------|---------------|-------------|-------------|------------|------------|------------|------------|-------------|------------|-------------|-------------|
| 28 <sup>th</sup> February | 33 ± 1     | 74 ± 3     | 5.5 ± 0.4     | 7.20 ± 0.07 | 284 ± 9     | 92 ± 3     | 214 ± 4    | 170 ± 10   | 146 ± 4    | 12.7 ± 0.7  | 220 ± 10   | 27.3 ± 0.8  | 310 ± 10    |
| 4 <sup>th</sup> March     | 8.4 ± 0.2  | 13.1 ± 0.8 | 0.96 ± 0.01   | 0.70 ± 0.03 | 19.2 ± 0.7  | 11 ± 1     | 19.2 ± 0.3 | 25 ± 1     | 38.5 ± 0.9 | 2.61 ± 0.04 | 29.2 ± 0.7 | 3.5 ± 0.1   | 35 ± 2      |
| 8 <sup>th</sup> March     | 42 ± 1     | 29 ± 1     | 4.1 ± 0.3     | 1.6 ± 0.1   | 76 ± 4      | 35 ± 1     | 56 ± 1     | 37 ± 1     | 90 ± 2     | 12.7 ± 0.2  | 650 ± 20   | 14.4 ± 0.7  | 350 ± 20    |
| 12 <sup>th</sup> March    | 149 ± 7    | 81 ± 2     | 27 ± 1        | 5.7 ± 0.2   | 84 ± 2      | 113 ± 2    | 240 ± 10   | 59 ± 3     | 500 ± 20   | 29.3 ± 0.9  | 298 ± 9    | 32.6 ± 0.3  | 1,040 ± 30  |
| 16 <sup>th</sup> March    | 75 ± 4     | 118 ± 3    | 12.6 ± 0.5    | 6.5 ± 0.2   | 35 ± 1      | 90 ± 2     | 208 ± 5    | 52 ± 3     | 342 ± 5    | 24.5 ± 0.4  | 365 ± 7    | 27.4 ± 0.3  | 790 ± 10    |
| 20 <sup>th</sup> March    | 47.0 ± 0.6 | 124 ± 4    | 8.3 ± 0.2     | 4.8 ± 0.2   | 51 ± 1      | 40 ± 1     | 184 ± 4    | 36 ± 1     | 268 ± 5    | 19.9 ± 0.4  | 370 ± 10   | 27.1 ± 0.8  | 351 ± 8     |
| 24 <sup>th</sup> March    | 31 ± 2     | 92 ± 2     | 5.4 ± 0.2     | 3.3 ± 0.1   | 32 ± 2      | 52 ± 2     | 140 ± 9    | 48 ± 1     | 202 ± 6    | 19.1 ± 0.3  | 300 ± 10   | 32.0 ± 0.5  | 330 ± 10    |
| 28 <sup>th</sup> March    | 22.0 ± 0.6 | 62 ± 2     | 3.26 ± 0.09   | 1.97 ± 0.08 | 22 ± 1      | 30 ± 1     | 103 ± 3    | 18 ± 1     | 100 ± 2    | 13.3 ± 0.2  | 175 ± 3    | 20 ± 1      | 160 ± 5     |
| 1 <sup>st</sup> April     | 73 ± 7     | 336 ± 6    | 10.7 ± 0.6    | 12.8 ± 0.8  | 85 ± 2      | 103 ± 3    | 627 ± 9    | 69 ± 5     | 320 ± 6    | 24.1 ± 0.8  | 1,250 ± 10 | 75 ± 2      | 600 ± 20    |
| 5 <sup>th</sup> April     | 369 ± 11   | 323 ± 6    | 45 ± 1        | 17 ± 1      | 134 ± 7     | 280 ± 10   | 870 ± 20   | 133 ± 5    | 1,160 ± 20 | 56 ± 1      | 1,190 ± 10 | 127 ± 3     | 2,600 ± 100 |
| 9 <sup>th</sup> April     | 84 ± 4     | 77 ± 3     | 13.7 ± 0.4    | 4.2 ± 0.1   | 103 ± 4     | 121 ± 3    | 165 ± 2    | 66 ± 4     | 485 ± 4    | 31.4 ± 0.5  | 256 ± 7    | 36.6 ± 0.5  | 690 ± 30    |
| 13 <sup>th</sup> April    | 21 ± 1     | 96 ± 3     | 2.7 ± 0.2     | 9.8 ± 0.2   | 92 ± 3      | 49 ± 1     | 1,270 ± 50 | 149 ± 4    | 87 ± 2     | 12.5 ± 0.3  | 410 ± 10   | 28 ± 1      | 190 ± 6     |
| 17 <sup>th</sup> April    | 13.9 ± 0.3 | 28 ± 1     | 2.1 ± 0.1     | 0.84 ± 0.02 | 20.7 ± 0.9  | 7.9 ± 0.4  | 53 ± 2     | 24 ± 1     | 56 ± 1     | 9.2 ± 0.3   | 102 ± 6    | 7.1 ± 0.3   | 105 ± 4     |
| 21 <sup>st</sup> April    | 13.5 ± 0.7 | 46 ± 1     | 2.3 ± 0.1     | 1.6 ± 0.1   | 11.0 ± 0.6  | 16.0 ± 0.8 | 69 ± 1     | 13.2 ± 0.9 | 43 ± 1     | 9.8 ± 0.2   | 195 ± 5    | 8.0 ± 0.5   | 101 ± 4     |
| 25 <sup>th</sup> April    | 11.9 ± 0.6 | 49 ± 1     | 2.14 ± 0.08   | 2.0 ± 0.1   | 21.6 ± 0.7  | 13.9 ± 0.4 | 86.9 ± 0.5 | 22 ± 1     | 53.1 ± 0.5 | 6.2 ± 0.1   | 192 ± 3    | 10.6 ± 0.5  | 85 ± 3      |
| 29 <sup>th</sup> April    | 14.7 ± 0.3 | 71 ± 3     | 2.1 ± 0.2     | 2.7 ± 0.2   | 17 ± 1      | 17 ± 1     | 143 ± 3    | 18.6 ± 0.7 | 59 ± 2     | 6.4 ± 0.2   | 230 ± 10   | 20.9 ± 0.7  | 127 ± 8     |
| 3 <sup>rd</sup> May       | 11.9 ± 0.6 | 53 ± 1     | 1.69 ± 0.08   | 1.5 ± 0.1   | 17.1 ± 0.3  | 15.8 ± 0.9 | 116 ± 5    | 17.4 ± 0.7 | 43 ± 1     | 6.3 ± 0.2   | 213 ± 4    | 14.1 ± 0.1  | 132 ± 4     |
| 7 <sup>th</sup> May       | 10.7 ± 0.8 | 64 ± 2     | 1.56 ± 0.07   | 3.26 ± 0.01 | 39 ± 1      | 17.4 ± 0.9 | 155 ± 1    | 38 ± 3     | 37 ± 1     | 3.4 ± 0.1   | 380 ± 7    | 18.5 ± 0.7  | 113 ± 4     |
| 11 <sup>th</sup> May      | 4.7 ± 0.2  | 32 ± 2     | 1.14 ± 0.06   | 0.89 ± 0.05 | 1.30 ± 0.06 | 3.8 ± 0.3  | 53 ± 2     | 6.2 ± 0.2  | 25.4 ± 0.8 | 3.3 ± 0.2   | 80 ± 2     | 5.7 ± 0.2   | 37 ± 2      |
| 15 <sup>th</sup> May      | 3.7 ± 0.4  | 14.2 ± 0.5 | 0.60 ± 0.01   | 0.50 ± 0.02 | 7.6 ± 0.2   | 249 ± 4    | 26.5 ± 0.5 | 7.7 ± 0.3  | 10.2 ± 0.2 | 2.6 ± 0.1   | 69.0 ± 0.8 | 2.39 ± 0.09 | 46 ± 2      |
| 19 <sup>th</sup> May      | 10.9 ± 0.6 | 41 ± 1     | 1.54 ± 0.07   | 1.51 ± 0.06 | 19.7 ± 0.4  | 9.6 ± 0.6  | 83 ± 2     | 17 ± 1     | 40 ± 1     | 5.3 ± 0.2   | 167 ± 7    | 12.3 ± 0.4  | 89 ± 3      |
| 23 <sup>rd</sup> May      | 15.7 ± 0.4 | 62 ± 2     | 2.41 ± 0.02   | 2.1 ± 0.1   | 39 ± 2      | 12.2 ± 0.3 | 124 ± 4    | 24 ± 2     | 51.3 ± 0.6 | 8.7 ± 0.3   | 233 ± 6    | 11.5 ± 0.4  | 149 ± 8     |
| 27 <sup>th</sup> May      | 11.3 ± 0.9 | 67 ± 4     | 2.06 ± 0.05   | 2.7 ± 0.2   | 6.8 ± 0.4   | 9.1 ± 0.3  | 139 ± 5    | 22 ± 1     | 40 ± 2     | 6.01 ± 0.07 | 333 ± 6    | 15.0 ± 0.6  | 117 ± 5     |
| 31 <sup>st</sup> May      | 8.5 ± 0.6  | 105 ± 3    | 0.94 ± 0.08   | 6.1 ± 0.2   | 172 ± 8     | 18.9 ± 0.9 | 360 ± 20   | 95 ± 5     | 25.2 ± 0.5 | 4.0 ± 0.2   | 330 ± 10   | 16.2 ± 0.6  | 61 ± 6      |
| 4 <sup>th</sup> June      | 3.6 ± 0.2  | 36 ± 2     | < 0.37        | 1.2 ± 0.1   | n.a.        | 40 ± 3     | 113 ± 1    | 10.7 ± 0.7 | 8.6 ± 0.3  | n.a.        | 107 ± 6    | 3.4 ± 0.2   | 19 ± 1      |
| 8 <sup>th</sup> June      | 7.5 ± 0.4  | 102 ± 4    | 1.08 ± 0.05   | 4.7 ± 0.2   | 12.1 ± 0.7  | 9.1 ± 0.6  | 251 ± 6    | 19 ± 1     | 16.5 ± 0.3 | 2.34 ± 0.05 | 393 ± 6    | 20.3 ± 0.5  | 50 ± 1      |
| 12 <sup>th</sup> June     | 10.1 ± 0.5 | 237 ± 7    | 0.380 ± 0.005 | 9.2 ± 0.5   | 33 ± 1      | 43 ± 2     | 530 ± 20   | 46 ± 3     | 23.0 ± 0.5 | 2.8 ± 0.2   | 790 ± 20   | 36.8 ± 0.9  | 51 ± 2      |
| 16 <sup>th</sup> June     | 5.9 ± 0.2  | 32 ± 2     | 1.00 ± 0.06   | 2.17 ± 0.07 | 29 ± 2      | 46 ± 3     | 95 ± 2     | 48 ± 1     | 18 ± 1     | 3.15 ± 0.05 | 203 ± 2    | 12.2 ± 0.3  | 37 ± 2      |
| 20 <sup>th</sup> June     | 10.1 ± 0.7 | 24 ± 1     | 0.56 ± 0.03   | 1.02 ± 0.07 | 13.6 ± 0.6  | 122 ± 2    | 44 ± 1     | 85 ± 4     | 29.9 ± 0.5 | 3.5 ± 0.1   | < 7.9      | 5.5 ± 0.4   | 440 ± 20    |

continued

| Sampling<br>start date     | As          | Ba         | Cd          | Co          | Cr         | Cu          | Mn         | Ni         | Pb          | Sb          | Ti         | V           | Zn         |
|----------------------------|-------------|------------|-------------|-------------|------------|-------------|------------|------------|-------------|-------------|------------|-------------|------------|
| 24 <sup>th</sup> June      | 4.98 ± 0.08 | 32 ± 1     | 0.39 ± 0.01 | 1.9 ± 0.2   | 41 ± 2     | 19.2 ± 0.6  | 93 ± 3     | 29 ± 1     | 12.9 ± 0.4  | 2.89 ± 0.09 | 66 ± 2     | 17 ± 1      | 70 ± 4     |
| 28 <sup>th</sup> June      | 4.8 ± 0.3   | 29 ± 1     | 0.47 ± 0.02 | 1.24 ± 0.07 | 55 ± 2     | 65 ± 2      | 49 ± 1     | 13.6 ± 0.7 | 10.7 ± 0.3  | 3.05 ± 0.09 | 102 ± 1    | 6.8 ± 0.4   | 67 ± 4     |
| 2 <sup>nd</sup> July       | 3.73 ± 0.06 | 12.6 ± 0.3 | 0.58 ± 0.04 | 0.80 ± 0.03 | 15.7 ± 0.7 | 2.5 ± 0.2   | 27.2 ± 0.1 | 13.9 ± 0.4 | 4.63 ± 0.06 | 2.26 ± 0.06 | 53.8 ± 0.8 | 3.7 ± 0.2   | 30 ± 2     |
| 6 <sup>th</sup> July       | 6.2 ± 0.2   | 45 ± 2     | 0.57 ± 0.03 | 3.6 ± 0.3   | 15.1 ± 0.5 | 66 ± 1      | 184 ± 9    | 15.7 ± 0.7 | 10.1 ± 0.2  | 2.22 ± 0.08 | 179 ± 6    | 7.8 ± 0.3   | 76 ± 3     |
| 10 <sup>th</sup> July      | 33 ± 2      | 156 ± 4    | 12.5 ± 0.4  | 4.59 ± 0.09 | 69 ± 2     | 72 ± 1      | 440 ± 10   | 97 ± 4     | 38 ± 1      | 3.95 ± 0.09 | 470 ± 10   | 90 ± 1      | 1,160 ± 20 |
| 14 <sup>th</sup> July      | 3.74 ± 0.07 | 53 ± 2     | < 0.35      | 1.29 ± 0.08 | 33 ± 1     | 8.7 ± 0.3   | 81 ± 2     | 44 ± 3     | 12.6 ± 0.4  | 2.6 ± 0.1   | 141 ± 8    | 5.4 ± 0.3   | 40 ± 2     |
| 18 <sup>th</sup> July      | 1.43 ± 0.01 | 16 ± 1     | 0.55 ± 0.02 | 0.51 ± 0.04 | 4.7 ± 0.2  | 0.03 ± 0.01 | 20.2 ± 0.6 | 12.9 ± 0.7 | 1.24 ± 0.06 | 2.6 ± 0.1   | 66 ± 3     | 0.74 ± 0.06 | 43 ± 2     |
| 22 <sup>nd</sup> July      | 3.9 ± 0.2   | 16.9 ± 0.8 | 0.78 ± 0.01 | 1.15 ± 0.06 | 20.0 ± 0.5 | 5.1 ± 0.2   | 55 ± 2     | 25 ± 1     | 4.8 ± 0.2   | 2.01 ± 0.05 | 118 ± 4    | 1.87 ± 0.03 | 69 ± 3     |
| 26 <sup>th</sup> July      | 6.94 ± 0.02 | 20 ± 1     | < 0.36      | 0.80 ± 0.07 | 128 ± 3    | 10.1 ± 0.6  | 30 ± 1     | 16.9 ± 0.7 | 10.3 ± 0.3  | 3.6 ± 0.1   | 54 ± 2     | 10.3 ± 0.2  | 50 ± 3     |
| 30 <sup>th</sup> July      | 6.7 ± 0.2   | 113 ± 3    | 2.0 ± 0.1   | 4.4 ± 0.4   | 46 ± 3     | 36 ± 2      | 168 ± 3    | 33 ± 1     | 13.9 ± 0.3  | 1.62 ± 0.08 | 118 ± 4    | 25 ± 2      | 320 ± 10   |
| 3 <sup>rd</sup> August     | 10.8 ± 0.2  | 124 ± 2    | 2.2 ± 0.1   | 1.91 ± 0.01 | 68 ± 4     | 21 ± 1      | 115 ± 2    | 29 ± 2     | 23.1 ± 0.5  | 3.8 ± 0.2   | 197 ± 7    | 14.8 ± 0.8  | 187 ± 7    |
| 7 <sup>th</sup> August     | 6.1 ± 0.3   | 21 ± 1     | 0.42 ± 0.03 | 0.82 ± 0.03 | 7.1 ± 0.2  | 2.86 ± 0.08 | 32 ± 2     | 17 ± 1     | 6.7 ± 0.2   | 2.30 ± 0.07 | 61 ± 4     | 4.2 ± 0.2   | 41 ± 2     |
| 11 <sup>th</sup> August    | 5.5 ± 0.3   | 26 ± 2     | < 0.35      | 1.7 ± 0.1   | 9.2 ± 0.5  | 8.2 ± 0.3   | 74 ± 2     | 13.7 ± 0.8 | 13.6 ± 0.4  | 1.99 ± 0.06 | 340 ± 20   | 9.1 ± 0.6   | 24 ± 1     |
| 15 <sup>th</sup> August    | 17 ± 1      | 36 ± 1     | 0.71 ± 0.03 | 0.82 ± 0.04 | 56 ± 1     | 33 ± 1      | 61 ± 2     | 81 ± 3     | 17.7 ± 0.3  | 2.59 ± 0.09 | 114 ± 4    | 14.6 ± 0.4  | 67 ± 3     |
| 19 <sup>th</sup> August    | 5.0 ± 0.1   | 10.1 ± 0.7 | < 0.37      | 0.44 ± 0.01 | 86 ± 2     | 3.8 ± 0.2   | 28.4 ± 0.7 | 40 ± 2     | 4.0 ± 0.1   | 1.08 ± 0.06 | 85 ± 3     | 4.4 ± 0.3   | < 26.59    |
| 23 <sup>th</sup> August    | 6.9 ± 0.2   | 18.7 ± 1   | 0.59 ± 0.03 | 1.68 ± 0.06 | 14.3 ± 0.3 | 11.3 ± 0.6  | 32.3 ± 0.5 | 22 ± 1     | 8.9 ± 0.5   | 5.1 ± 0.2   | 320 ± 10   | 7.3 ± 0.5   | 46 ± 3     |
| 27 <sup>th</sup> August    | 3.2 ± 0.2   | 56 ± 3     | 0.49 ± 0.05 | 2.0 ± 0.1   | 21.8 ± 0.8 | 6.0 ± 0.4   | 290 ± 10   | 52 ± 2     | 12.6 ± 0.5  | 1.09 ± 0.06 | 85 ± 2     | 0.90 ± 0.08 | 33 ± 2     |
| 31 <sup>st</sup> August    | 1.76 ± 0.06 | 15.8 ± 0.3 | < 0.36      | 0.63 ± 0.06 | 20.8 ± 0.7 | 0.52 ± 0.03 | 41 ± 2     | 21 ± 1     | 3.9 ± 0.1   | 2.8 ± 0.1   | 44 ± 1     | 1.8 ± 0.1   | 18.6 ± 0.7 |
| 4 <sup>th</sup> September  | 12.7 ± 0.5  | 18.0 ± 0.3 | 1.5 ± 0.1   | 0.68 ± 0.06 | 15.2 ± 0.4 | 155 ± 2     | 36 ± 1     | 107 ± 7    | 10.3 ± 0.2  | 2.38 ± 0.08 | < 8.2      | 3.10 ± 0.07 | 43 ± 1     |
| 8 <sup>th</sup> September  | 8.9 ± 0.4   | 111 ± 4    | < 0.55      | 4.4 ± 0.2   | 84 ± 2     | 25 ± 1      | 167 ± 9    | 91 ± 4     | 12.6 ± 0.4  | 5.6 ± 0.1   | 530 ± 20   | 18.4 ± 0.8  | 144 ± 9    |
| 12 <sup>th</sup> September | 6.35 ± 0.09 | 24 ± 1     | 0.57 ± 0.02 | 2.4 ± 0.1   | 48 ± 1     | 18.0 ± 0.7  | 58 ± 2     | 37 ± 2     | 26.4 ± 0.7  | 4.2 ± 0.3   | 58.0 ± 0.4 | 16.6 ± 0.5  | 73 ± 4     |
| 16 <sup>th</sup> September | 14.4 ± 0.9  | 210 ± 2    | 0.53 ± 0.04 | 10.8 ± 0.4  | 71 ± 2     | 32 ± 1      | 324 ± 4    | 67 ± 2     | 28.2 ± 0.7  | 2.25 ± 0.04 | 1,280 ± 40 | 41.4 ± 0.9  | 92 ± 4     |
| 20 <sup>th</sup> September | 6.3 ± 0.4   | 58 ± 4     | 1.59 ± 0.09 | 3.26 ± 0.09 | 18 ± 1     | 35 ± 1      | 120 ± 1    | 56 ± 2     | 13.1 ± 0.4  | 2.01 ± 0.09 | 260 ± 10   | 14.2 ± 0.7  | 104 ± 6    |
| 24 <sup>th</sup> September | 3.03 ± 0.01 | 103 ± 3    | < 0.37      | < 0.37      | 5.0 ± 0.2  | 55 ± 2      | 14.3 ± 0.8 | 12.2 ± 0.7 | 177 ± 3     | 7.7 ± 0.1   | 16.9 ± 0.8 | 0.96 ± 0.08 | 46 ± 3     |
| 28 <sup>th</sup> September | 4.6 ± 0.2   | 43 ± 2     | < 0.33      | 2.37 ± 0.06 | 48 ± 1     | 147 ± 1     | 97 ± 3     | 35 ± 1     | 8.4 ± 0.3   | 3.28 ± 0.05 | 340 ± 10   | 11.6 ± 0.6  | 58 ± 3     |
| 2 <sup>nd</sup> October    | 4.2 ± 0.1   | 107 ± 3    | < 0.33      | 4.5 ± 0.3   | 134 ± 1    | 10.8 ± 0.5  | 185 ± 5    | 24 ± 1     | 15.9 ± 0.4  | 2.33 ± 0.08 | 320 ± 10   | 19.6 ± 0.6  | 37 ± 1     |
| 6 <sup>th</sup> October    | 7.6 ± 0.7   | 26 ± 1     | < 0.43      | 0.92 ± 0.08 | 14.9 ± 0.6 | 37 ± 3      | 34.4 ± 0.6 | 24 ± 1     | 11.3 ± 0.3  | 3.1 ± 0.2   | 139 ± 5    | 12.9 ± 0.9  | 55 ± 2     |
| 14 <sup>th</sup> October   | 4.30 ± 0.04 | 81 ± 3     | < 0.32      | 4.0 ± 0.1   | 39.8 ± 0.3 | 26.9 ± 0.5  | 253 ± 5    | 21.7 ± 0.6 | 11.4 ± 0.3  | 2.68 ± 0.06 | 289 ± 2    | 20.3 ± 0.6  | 48 ± 2     |
| 18 <sup>th</sup> October   | 2.25 ± 0.01 | 21 ± 1     | < 0.34      | 1.6 ± 0.1   | 47 ± 2     | 16.5 ± 0.6  | 42 ± 1     | 22 ± 1     | 5.27 ± 0.08 | 1.28 ± 0.04 | 98 ± 4     | 2.8 ± 0.2   | 30 ± 1     |

**Supplementary Table S5.** Extraction percentages obtained for fraction I on the samples subjected to sequential extraction.

| <b>Sampling<br/>start date</b> | <b>Al</b> | <b>As</b> | <b>Ba</b> | <b>Ca</b> | <b>Cd</b> | <b>Co</b> | <b>Cr</b> | <b>Cu</b> | <b>Fe</b> | <b>K</b> | <b>Mg</b> | <b>Mn</b> | <b>Na</b> | <b>Ni</b> | <b>Pb</b> | <b>Sb</b> | <b>Ti</b> | <b>V</b> | <b>Zn</b> |
|--------------------------------|-----------|-----------|-----------|-----------|-----------|-----------|-----------|-----------|-----------|----------|-----------|-----------|-----------|-----------|-----------|-----------|-----------|----------|-----------|
| 28 <sup>th</sup> February      | 85        | 94        | 39        | 78        | 100       | 63        | 27        | 84        | 29        | 90       | 96        | 86        | 97        | 64        | 96        | 90        | 16        | 80       | 96        |
| 8 <sup>th</sup> March          | 44        | 96        | 26        | 79        | 39        | 26        | 16        | 72        | 28        | 96       | 97        | 34        | 98        | 65        | 93        | 85        | 11        | 80       | 97        |
| 16 <sup>th</sup> March         | 17        | 94        | 42        | 77        | 93        | 56        | 16        | 74        | 25        | 88       | 96        | 67        | 97        | 51        | 94        | 77        | 6         | 68       | 95        |
| 24 <sup>th</sup> March         | 26        | 93        | 50        | 78        | 100       | 60        | 37        | 76        | 35        | 90       | 96        | 69        | 98        | 76        | 96        | 88        | 14        | 78       | 97        |
| 1 <sup>st</sup> April          | 18        | 87        | 56        | 79        | 86        | 60        | 13        | 79        | 24        | 71       | 89        | 77        | 96        | 54        | 95        | 83        | 6         | 59       | 90        |
| 9 <sup>th</sup> April          | 89        | 91        | 44        | 60        | 100       | 72        | 15        | 88        | 52        | 83       | 87        | 78        | 94        | 70        | 97        | 86        | 20        | 82       | 98        |
| 17 <sup>th</sup> April         | 33        | 87        | 27        | 66        | 64        | 53        | 8         | 70        | 25        | 80       | 79        | 68        | 89        | 46        | 86        | 82        | 10        | 64       | 96        |
| 25 <sup>th</sup> April         | 28        | 90        | 35        | 74        | 100       | 50        | 7         | 56        | 27        | 77       | 85        | 67        | 91        | 66        | 89        | 82        | 10        | 58       | 96        |
| 3 <sup>rd</sup> May            | 20        | 84        | 31        | 70        | 100       | 60        | 8         | 68        | 24        | 77       | 87        | 13        | 94        | 77        | 84        | 66        | 5         | 54       | 94        |
| 11 <sup>th</sup> May           | 52        | 88        | 29        | 69        | 100       | 55        | 7         | 60        | 33        | 78       | 74        | 65        | 84        | 28        | 93        | 84        | 14        | 56       | 98        |
| 23 <sup>rd</sup> May           | 25        | 86        | 42        | 75        | 60        | 47        | 17        | 60        | 23        | 82       | 90        | 48        | 95        | 51        | 84        | 69        | 7         | 61       | 93        |
| 31 <sup>st</sup> May           | 19        | 79        | 30        | 69        | 100       | 65        | 8         | 58        | 27        | 60       | 85        | 81        | 94        | 59        | 89        | 80        | 10        | 39       | 91        |
| 12 <sup>nd</sup> June          | 12        | 64        | 27        | 88        | 69        | 50        | 7         | 68        | 26        | 39       | 86        | 68        | 93        | 40        | 75        | 66        | 7         | 27       | 96        |
| 20 <sup>th</sup> June          | 39        | 87        | 34        | 70        | 100       | 57        | 9         | 74        | 36        | 80       | 88        | 68        | 94        | 54        | 95        | 85        | 15        | 68       | 93        |
| 2 <sup>nd</sup> July           | 14        | 83        | 13        | 63        | 29        | 27        | 15        | 56        | 27        | 87       | 91        | 21        | 95        | 58        | 82        | 67        | 7         | 50       | 95        |
| 22 <sup>nd</sup> July          | 8         | 75        | 19        | 54        | 65        | 35        | 4         | 67        | 22        | 81       | 81        | 51        | 87        | 46        | 72        | 62        | 9         | 46       | 93        |
| 3 <sup>rd</sup> August         | 43        | 92        | 45        | 74        | 100       | 60        | 19        | 65        | 38        | 86       | 87        | 77        | 94        | 76        | 90        | 82        | 17        | 72       | 96        |
| 11 <sup>th</sup> August        | 21        | 85        | 27        | 70        | 29        | 26        | 8         | 67        | 31        | 81       | 86        | 66        | 92        | 61        | 85        | 69        | 16        | 66       | 95        |
| 19 <sup>th</sup> August        | 79        | 91        | 26        | 72        | 100       | 59        | 17        | 70        | 49        | 91       | 94        | 60        | 97        | 54        | 84        | 77        | 45        | 71       | 91        |
| 31 <sup>st</sup> August        | 22        | 84        | 18        | 66        | 54        | 38        | 6         | 59        | 20        | 81       | 86        | 17        | 92        | 40        | 81        | 64        | 5         | 38       | 96        |
| 8 <sup>th</sup> September      | 39        | 85        | 31        | 77        | 100       | 57        | 16        | 65        | 36        | 87       | 94        | 68        | 98        | 58        | 87        | 83        | 15        | 43       | 94        |
| 20 <sup>th</sup> September     | 18        | 75        | 26        | 73        | 84        | 51        | 16        | 56        | 25        | 78       | 91        | 44        | 96        | 71        | 76        | 42        | 9         | 32       | 94        |
| 28 <sup>th</sup> September     | 54        | 85        | 32        | 87        | 100       | 61        | 18        | 72        | 45        | 95       | 98        | 73        | 99        | 54        | 89        | 84        | 48        | 60       | 94        |
| 14 <sup>th</sup> October       | 14        | 67        | 32        | 78        | 35        | 15        | 13        | 68        | 23        | 84       | 94        | 33        | 98        | 47        | 79        | 62        | 7         | 47       | 90        |

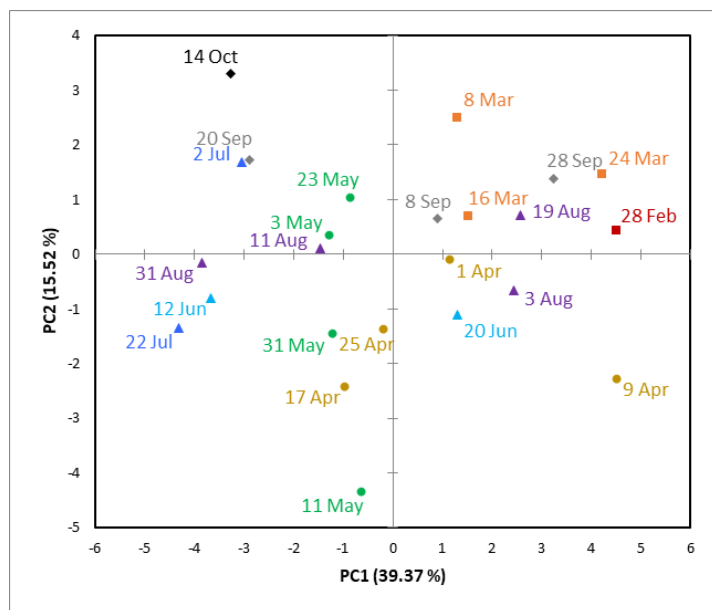

(a)

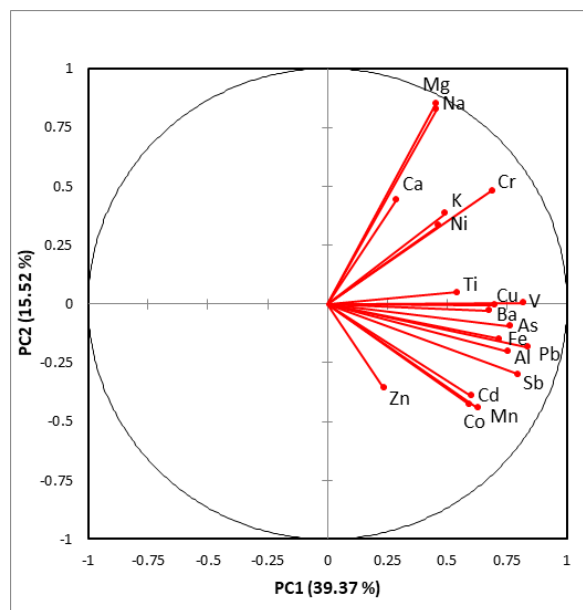

(b)

**Supplementary Figure S1.** Principal Component Analysis performed on the results of the sequential extraction: (a) score and (b) loading plot.
